# Supplementary material
Source: PubMed Central journal article supplement (PMC4010371)
Supplement: aps201222x1.pdf [file aps201222x1.pdf]

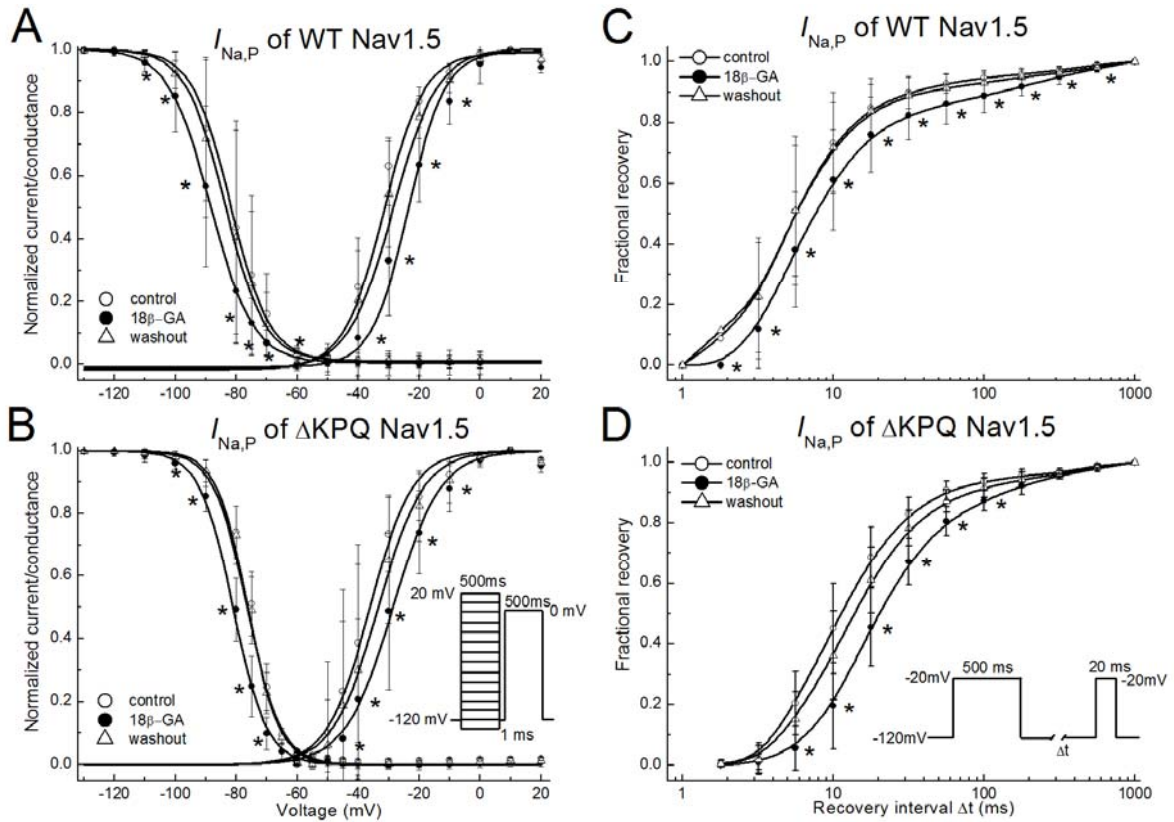

**Figure 1S.** Effects of 18 $\beta$ -GA on the kinetics of  $I_{Na,P}$  of WT and  $\Delta$ KPQ Nav1.5 channels. Steady-state activation and inactivation curve for  $I_{Na,P}$  of WT (at 30  $\mu$ mol/L, (A) and  $\Delta$ KPQ (at 100  $\mu$ mol/L), (B) fitted to Boltzmann functions. The time course of recovery from inactivation of average data fitted to a double exponential equation.  $I_{Na,P}$  of WT (C) and  $\Delta$ KPQ (D) Nav1.5 channels. Inset: Voltage-clamp protocol.

$n=6$  per group;  $*P<0.05$ . Parameters of fits to the averaged data are summarized in Table 1 and Table 2.
